# Supplementary material
Source: PubMed Central journal article supplement (PMC3401998)
Supplement: emmm0003-0005-SD1.pdf [file emmm0003-0005-SD1.pdf]

**Supplementary Table 1.** General characteristics and renal function in healthy kidney donors and patients with septic acute kidney injury.

| Subject Number                             | Gender | Age (years) | Diagnostics                                              | Baseline SCr (mg/dL) | SCr at AKI (urine sampling in healthy donors) | Follow-up after Sampling (days) | Outcome/Last SCr (mg/dL) |
|--------------------------------------------|--------|-------------|----------------------------------------------------------|----------------------|-----------------------------------------------|---------------------------------|--------------------------|
| <b>Healthy Kidney Living-Donors</b>        |        |             |                                                          |                      |                                               |                                 |                          |
| 1                                          |        | 27          | Healthy                                                  | NA                   | 0.82                                          | NA                              | NA                       |
| 2                                          |        | 25          | Healthy                                                  | NA                   | 0.95                                          | NA                              | NA                       |
| 3                                          |        | 32          | Healthy                                                  | NA                   | 0.85                                          | NA                              | NA                       |
| 4                                          |        | 42          | Healthy                                                  | NA                   | 0.77                                          | NA                              | NA                       |
| 5                                          |        | 35          | Healthy                                                  | NA                   | 0.56                                          | NA                              | NA                       |
| <b>Septic Acute Kidney Injury patients</b> |        |             |                                                          |                      |                                               |                                 |                          |
| 1                                          | Female | 51          | Community-Acquired Pneumonia & Morbid Obesity            | 0.50                 | 1.2                                           | 122                             | Recovery/0.62            |
| 2                                          | Male   | 49          | Abdominal Sepsis                                         | 0.60                 | 3.42                                          | 28                              | Death                    |
| 3                                          | Male   | 24          | Community-Acquired Pneumonia & Systemic Lupus            | 0.32                 | 0.83                                          | 24                              | Unrecovery/2.42          |
| 4                                          | Female | 39          | Community-acquired pneumonia & Meningitis & Septic shock | 0.49                 | 1.19                                          | 45                              | Recovery/0.48            |
| 5                                          | Female | 84          | Community-Acquired Pneumonia                             | 0.73                 | 1.14                                          | 1                               | Death                    |
| 6                                          | Male   | 34          | Community-Acquired Pneumonia                             | 0.75                 | 1.86                                          | 61                              | Improvement/1.12         |
| 7                                          | Female | 84          | Community-Acquired Pneumonia & Heart Failure             | 0.93                 | 3.11                                          | 40                              | Recovery/1.04            |
| 8                                          | Female | 35          | Systemic Lupus & Community-Acquired Pneumonia            | 0.44                 | 2.19                                          | 5                               | Improvement /1.29        |
| 9                                          | Male   | 46          | Septic Arthritis & Diabetes mellitus                     | 0.72                 | 5.75                                          | 138                             | Recovery/0.77            |
